# Pentobarbital Dose-dependently Increases Respiratory Genioglossus Muscle Activity while Impairing Diaphragmatic Function in Anesthetized Rats

Matthias Eikermann, M.D., Ph.D.,\* Philipp Fassbender, M.D.,† Sebastian Zaremba,‡ Amy S. Jordan, Ph.D.,§ Carl Rosow, M.D., Ph.D.,|| Atul Malhotra, M.D.,# Nancy L. Chamberlin, Ph.D.\*\*

**Background:** Anesthetics depress both ventilatory and upper airway dilator muscle activity and thus put the upper airway at risk for collapse. However, these effects are agent-dependent and may involve upper airway and diaphragm muscles to varying degrees. The authors assessed the effects of pentobarbital on upper airway dilator and respiratory pump muscle function in rats and compared these results with the effects of normal sleep.

**Methods:** Tracheostomized rats were given increasing doses of pentobarbital to produce deep sedation then light and deep anesthesia, and negative pressure airway stimuli were applied ( $n = 11$ ). To compare the effects of pentobarbital with those of natural sleep, the authors chronically instrumented rats ( $n = 10$ ) with genioglossus and neck electromyogram and electroencephalogram electrodes and compared genioglossus activity during wakefulness, sleep (rapid eye movement and non-rapid eye movement), and pentobarbital anesthesia.

**Results:** Pentobarbital caused a dose-dependent decrease in ventilation and in phasic diaphragmatic electromyogram by  $11 \pm 0.1\%$ , but it increased phasic genioglossus electromyogram by  $23 \pm 0.2\%$ . Natural non-rapid eye movement sleep and pentobarbital anesthesia (10 mg/kg intraperitoneally) decreased respiratory genioglossus electromyogram by  $61 \pm 29\%$  and  $45 \pm 35\%$ , respectively, and natural rapid eye movement sleep caused the greatest decrease in phasic genioglossus electromyogram ( $95 \pm 0.3\%$ ).

**Conclusions:** Pentobarbital in rats impairs respiratory genioglossus activity compared to the awake state, but the decrease is no greater than seen during natural sleep. During anesthesia, in the absence of pharyngeal airflow, phasic genioglossus activity is increased in a dose-dependent fashion.

\* Assistant Professor, Department of Anesthesia, Massachusetts General Hospital, and Harvard Medical School, Boston, Massachusetts, and Universitätsklinikum Essen, Klinik fuer Anästhesie und Intensivmedizin, Essen, Germany; † Resident, Universitätsklinikum Essen, Klinik fuer Anästhesie und Intensivmedizin, Essen, Germany, and Department of Neurology, Beth Israel Deaconess Medical Center and Harvard Medical School, Boston, Massachusetts; ‡ Research Associate, Department of Neurology, Beth Israel Deaconess Medical Center and Harvard Medical School, Boston, Massachusetts; § Instructor, Divisions of Sleep Medicine and Pulmonary/Critical Care, Brigham and Women's Hospital and Harvard Medical School; || Professor of Anesthesia, Department of Anesthesia, Massachusetts General Hospital, and Harvard Medical School, Boston, Massachusetts; # Assistant Professor, Divisions of Sleep Medicine and Pulmonary/Critical Care, Brigham and Women's Hospital and Harvard Medical School; \*\* Assistant Professor, Department of Neurology, Beth Israel Deaconess Medical Center and Harvard Medical School, Boston, Massachusetts.

Received from the Department of Anesthesia and Critical Care, Massachusetts General Hospital, and Harvard Medical School, Boston, Massachusetts. Submitted for publication October 21, 2008. Accepted for publication February 4, 2009. Supported by grants P50 HL060292, RO1-HL73146, RO1-HL085188, and AG024837 from the National Institute of Health (Bethesda, Maryland), by an Established Investigator Award from the American Heart Association (Dallas, Texas), and by grant DFG-EI684/2-1 from the German Research Council (Bonn, Germany).

Address correspondence to Dr. Eikermann: Department of Anesthesia and Critical Care, Massachusetts General Hospital, Harvard Medical School, 55 Fruit St, Boston, Massachusetts 02114-2696. meikermann@partners.org. Information on purchasing reprints may be found at [www.anesthesiology.org](http://www.anesthesiology.org) or on the masthead page at the beginning of this issue. ANESTHESIOLOGY's articles are made freely accessible to all readers, for personal use only, 6 months from the cover date of the issue.

GENERAL anesthetic agents,<sup>1-6</sup> including propofol,<sup>4,6</sup> isoflurane,<sup>5</sup> and thiopentone,<sup>3</sup> predispose the upper airway to collapse, at least in part by decreasing upper airway muscle activity.<sup>1-4</sup> Surprisingly, recent data suggest that certain anesthetics, including pentobarbital, can increase genioglossus phasic activity.<sup>7,8</sup> We have recently demonstrated that isoflurane dose-dependently increases respiratory genioglossus activity and that this effect is the result of concomitant increases in phasic respiratory drive as assessed by flow rate.<sup>9</sup> Nonetheless, the overall effect of most anesthetics is to impair upper airway integrity as the transition is made from awake to anesthetized. To our knowledge, direct comparisons of anesthetic effects on airway muscle activity have not been made between anesthesia and various sleep states. Electroencephalographic sleep staging is required for this purpose because undetected arousal may affect the control of ventilation, which in turn may influence upper airway muscle control. Comparative studies on the effects of sedation, anesthesia, and sleep on respiratory muscle function will help understand if anesthesia compared with normal sleep puts a patient at an increased risk to develop an airway obstruction. Furthermore, it might provide a better understanding of whether or not patients with pathologic airway anatomy, e.g., patients with obstructive sleep apnea, who recover postoperatively from the effects of anesthetics are still at an increased risk to develop an airway obstruction. In many institutions, patients with obstructive sleep apnea are closely monitored for apneic events during the first postoperative night even after minor surgical procedures, but it is unclear if this effort-consuming approach to patient care is justified.

Based on the results of Younes *et al.*<sup>8</sup> who observed an increased genioglossus activity during sleep in rats given pentobarbital compared with placebo, we tested the hypotheses that pentobarbital causes a dose-dependent increase in respiratory genioglossus activity even in the face of declining respiratory activation of the diaphragm. Based on the data of Drummond *et al.*<sup>3</sup> who observed a decrease in genioglossus activity during transition from wakefulness to pentobarbital anesthesia, we tested the secondary hypothesis that pentobarbital decreases phasic genioglossus activity when compared with wakefulness. Finally, we tested the hypothesis that the effects of pentobarbital on genioglossus activity differ from those observed during natural rapid eye movement (REM) and non-REM sleep.

## Materials and Methods

Sprague-Dawley adult male rats (300–400 g; Harlan Sprague-Dawley, Indianapolis, IN) were used in these protocols. All procedures involving animals were approved by the Institutional Animal Care and Use Committees at Harvard Medical School and Beth Israel Deaconess Medical Center.

### Protocol 1: Acute Experiments

In 11 rats, after induction of anesthesia with  $35 \pm 2.8$  mg of intraperitoneal pentobarbital (Nembutal; Ovation Pharmaceuticals Inc., Deerfield, IL) and surgical instrumentation, we performed intermittent tail-clamping maneuvers until the rat regained a withdrawal response (deep sedation). Deep sedation was said to occur when the rat displayed gross and purposeful movement<sup>10</sup> that resolved after the end of tail clamping. After measurements of respiratory muscle function and breathing, we then started a pentobarbital infusion at a rate of  $75 \text{ mg} \cdot \text{kg}^{-1} \cdot \text{h}^{-1}$ <sup>11</sup> and performed the second series of measurements of respiratory function (light anesthesia) when the

rats' withdrawal response to tail-clamping was again abolished. Another pentobarbital infusion was then given to apply an additional 50% of the pentobarbital dose that had been required to turn deep sedation into light anesthesia (deep anesthesia). A representative recording is given in figure 1.

We cannulated the femoral artery and vein with PE50 tubing, transected and cannulated the trachea with PE240 tubing through which the rat spontaneously breathed, and then inserted by open surgery two insulated stainless steel wires (California Fine Wire Co., Grover Beach, CA) into the genioglossus muscle and the diaphragm, one on each side of the midline. For the purpose of measuring the genioglossus negative pressure reflex, the rats' nares were occluded by a plastic cap placed over the muzzle and sealed with glue. Subatmospheric pressure could be applied through a fitting on this cap by gating a vacuum source with a solenoid valve. For measurement of the magnitude of pharyngeal pressure, we inserted a pressure-sensitive catheter (Millar Instruments, Houston, TX) through the tracheostomy so that the tip was located in the rostral trachea just below

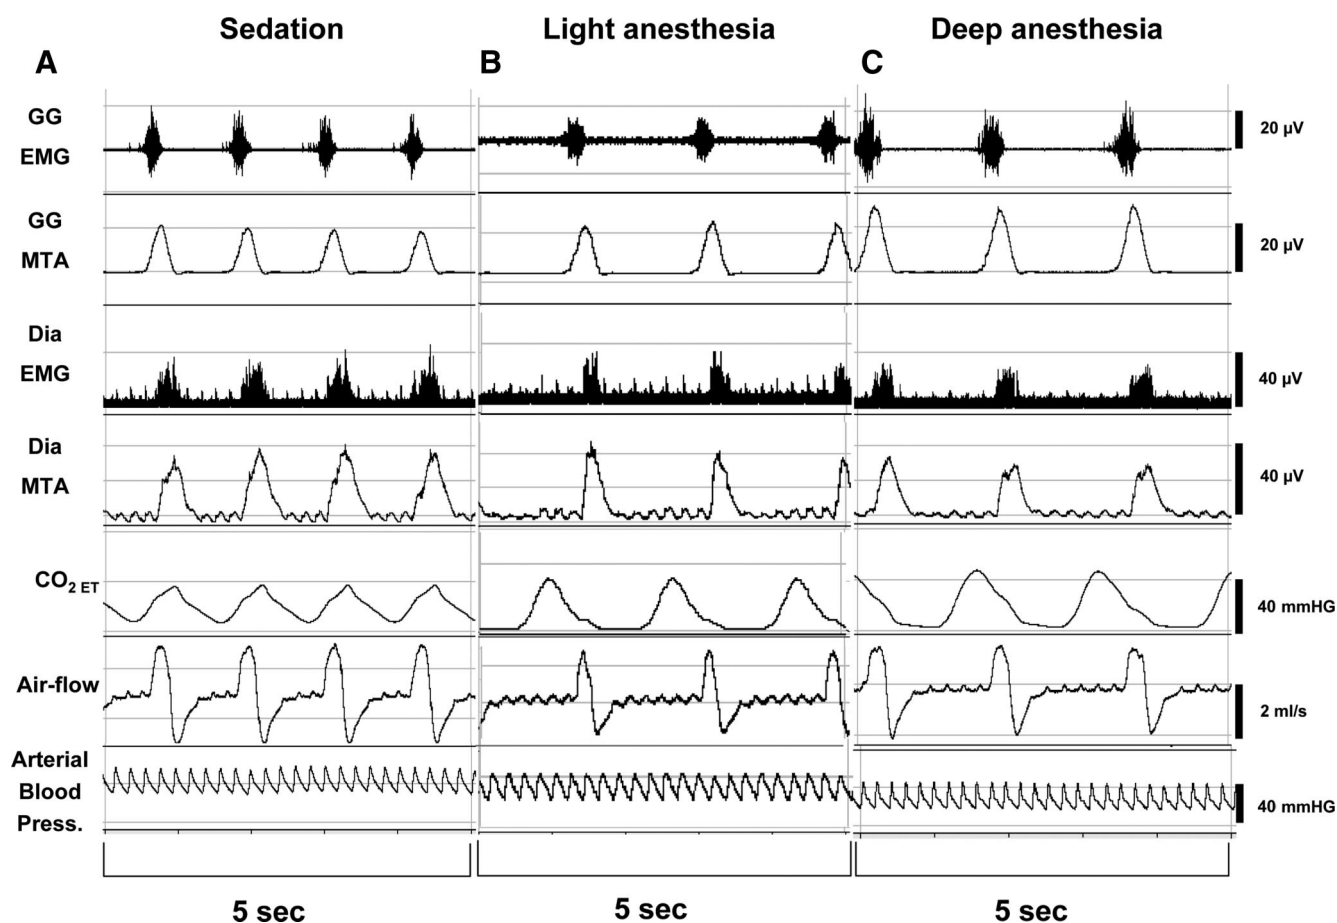

Fig. 1. Original recording from an acute experiment. Typical response to increasing the pentobarbital dose. Genioglossus (GG) electromyogram (EMG) and diaphragmatic (Dia) EMG, respiratory flow, end-tidal carbon dioxide ( $\text{CO}_{2\text{ET}}$ ) concentration, and arterial blood pressure during increasing doses of pentobarbital. With increasing pentobarbital concentrations, phasic genioglossus activity and carbon dioxide increased, whereas diaphragmatic activity, respiratory rate, and respiratory flow decreased. MTA = moving time average.

the level of the thyroid cartilage.<sup>9</sup> Measurements of pharyngeal pressure were made under zero flow conditions.

We measured breathing using pneumotachography for a period of 2 min at each measurement point. This was followed by a series of three 4-s negative pressure maneuvers applied to the pharynx every 60 s. The genioglossus negative pressure reflex was taken as the percent change in genioglossus amplitude during negative pressure (the average of the second, third, and fourth breaths after the onset of negative pressure application) compared to the average during the three breaths just before negative pressure application. For each rat, we applied a stimulus that produced a consistent increase in genioglossus activity under baseline conditions (on average,  $-25$  cm H<sub>2</sub>O).<sup>9</sup> The negative pressure stimulus was kept constant throughout the remainder of each experiment.

### Protocol 2: Chronically Instrumented Rats

To assess the effects of pentobarbital on genioglossus activity during wakefulness and sleep, we chronically instrumented 10 rats with electrodes for genioglossus and neck electromyography, as well as cortical electroencephalogram.<sup>12</sup> Animals were anesthetized with chlo-

ral hydrate (350 mg/kg), and the skull was exposed. Two flexible electromyography wire electrodes (Plastics One Inc., Roanoke, VA) were placed into the genioglossus muscle through a ventral incision, and the wires were subcutaneously tunneled to the neck. Another two electromyography wires were surgically implanted in the neck muscles. For measurement of electroencephalographic signals, two screw electrodes (Plastics One Inc.) were inserted into holes drilled into the skull, one approximately 0.2 cm anterior and one approximately 0.5 cm posterior to the coronal line and approximately 0.3 cm lateral to the midline. The free ends of the leads were connected to a socket (Plastics One Inc.) that was attached to the skull with dental cement. The incisions were then closed with wound clips and suture.

Rats were allowed to recover 7 days from chronic instrumentation. During the subsequent night, we performed measurements in various sleep stages in the absence of pentobarbital administration (fig. 2). With a time delay of 24 h or more, rats were then given pentobarbital (10 mg or 20 mg intraperitoneally,  $n = 10$ ), and we measured time course of genioglossus and neck muscle function during the transition from wakefulness to

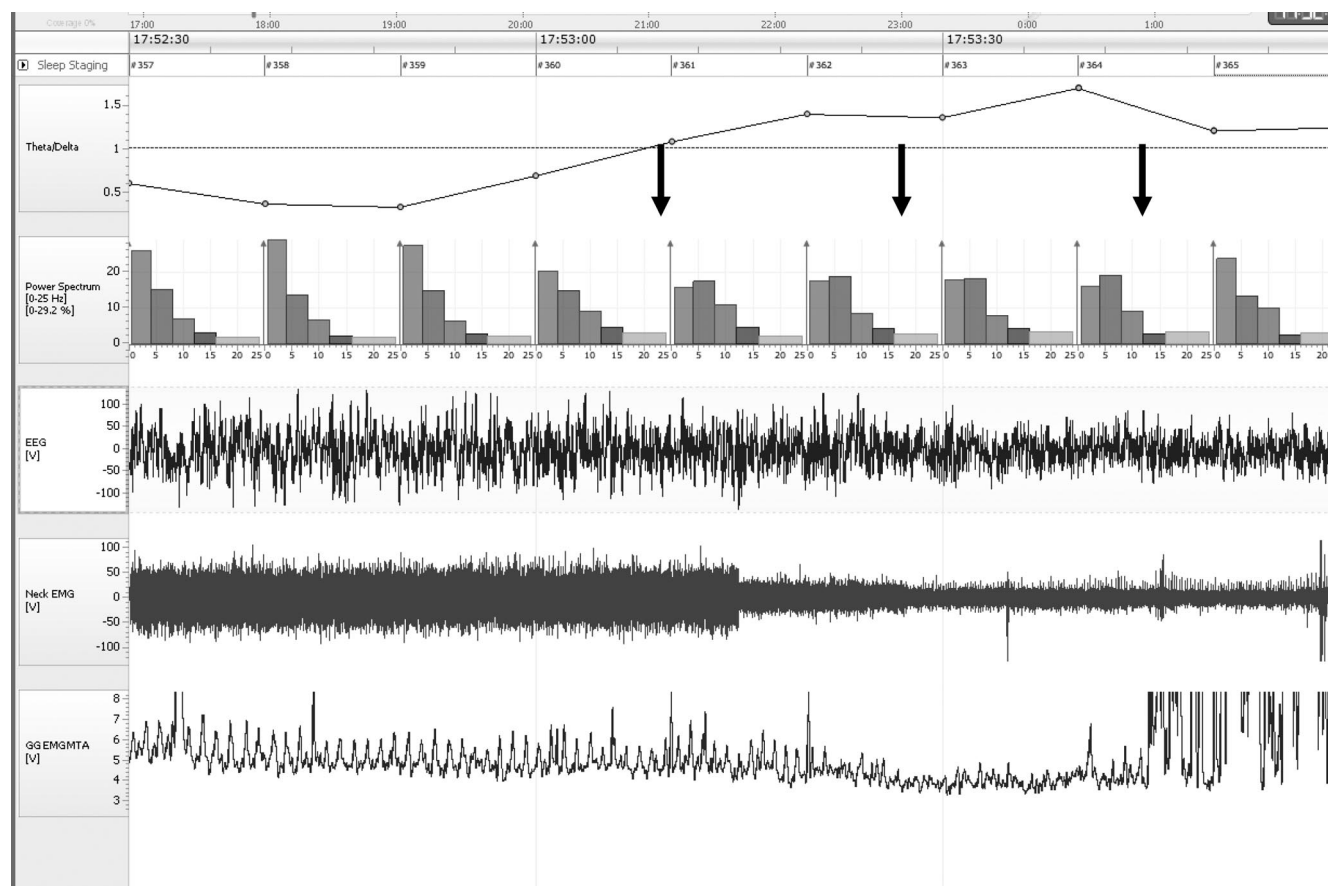

**Fig. 2.** Rat polysomnography. Experiment in a chronically instrumented rat (sleep experiment). Typical transition from non-rapid eye movement (REM) to REM sleep. *First arrow* = point of conversion of theta/delta ratio to greater than 1. *Second arrow* = start point of genioglossus activity measurements (low neck-muscle activity). *Third arrow* = endpoint of genioglossus activity measurements (onset of tongue muscle twitches). EEG = electroencephalogram; EMG = electromyogram; GG = genioglossus; MTA = moving time average.



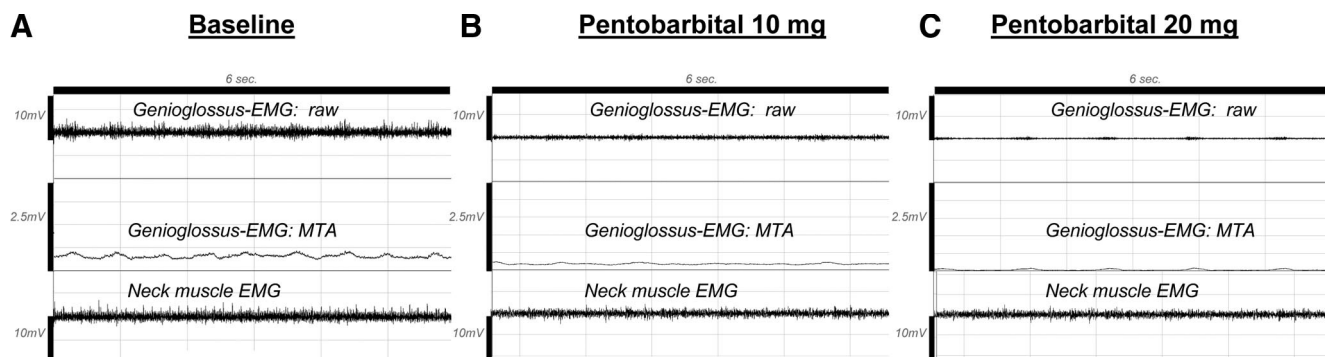

**Fig. 3.** Original recording from an experiment in a chronically instrumented rat (anesthesia experiment). Typical response to pentobarbital. (A) Baseline condition. During wakefulness, the genioglossus muscle showed a strong phasic activity in this rat. (B) Five minutes after administration of 10 mg of pentobarbital. Phasic and tonic muscle activities were markedly lower. (C) Five minutes after administration of 20 mg of pentobarbital (same rat as shown in panel A). Genioglossus and neck muscle activity are markedly decreased; note that the activity of the latter is relatively preserved compared with the genioglossus. EMG = electromyogram; MTA = moving time average.

anesthesia (fig. 3). Pentobarbital 10 mg/kg and 20 mg/kg were given to the same rats on different days; 72 h or more elapsed between the measurements.

The sockets were connected *via* flexible recording cables and a commutator to the recording equipment. The animal stayed in its cage during the whole measurement to minimize stress, and it was allowed to habituate to the new situation for a minimum of 5 h before the recordings were performed. The electromyograms and electroencephalograms were recorded after the rats had been immobile for at least 5 min.

Genioglossus activity was measured during the non-anesthetized state, 10 min after pentobarbital injection, and after euthanasia. The latter measurement was performed to discriminate between electrical noise and tonic genioglossus activity. After euthanasia, the two wires connected to the genioglossus muscle were stimulated electrically, and movements of the tongue were observed to ensure the correct position of the wires. A representative recording of genioglossus activity in a chronically instrumented rat is depicted in figure 3.

Sleep stages were determined by analyzing the electroencephalogram and electromyograms recorded during the whole experiment. Genioglossus activity was measured for 10 s during five consecutive episodes of REM and non-REM sleep, and the averages for these two stages were compared to values measured during quiet wakefulness (no movements, eyes open, neck muscle activity higher compared with sleep). REM sleep was defined by two criteria: (1) theta/delta ratio of greater than 1 and (2) decrease in neck muscle activity (by 25% compared with non-REM; fig. 2). Episodes of tongue muscle twitches typically occurring during REM were not analyzed. Non-REM sleep was characterized by  $\beta$ -rhythm (14 to 30 Hz) or  $\delta$ -activity (0.5 to 4 Hz) in the electroencephalographic and by closed eyes. Electroencephalographic signals were analyzed on a desktop computer using Sleep Sign for Animals (Kissei Comtec Co., Ltd., Nagano, Japan).

#### Data Acquisition and Analysis

The primary outcome variable was genioglossus activity. Genioglossus electromyography signals were amplified (Grass Instruments, West Warwick, RI) and filtered (100–1000 Hz), and moving time was averaged (100 ms) and digitized by a computer. Signals were analyzed with Clampfit (Molecular Devices, Sunnyvale, CA) and Igor Pro (WaveMetrics, Inc., Lake Oswego, OR). Phasic (respiratory) moving time average was used for analysis. Tonic genioglossus activity was defined as nadir genioglossus activity during expiration minus genioglossus activity measured in the dead rat after euthanasia (reflecting the degree of electrical noise).<sup>13</sup> End-tidal carbon dioxide was measured by CAPSTAR-100 Carbon Dioxide Analyzer (CWE Inc., Ardmore, PA).

#### Statistical Analysis

We tested the hypotheses that pentobarbital *increases* the respiratory genioglossus activity and *decreases* respiratory diaphragmatic activity. Statistical comparisons were made by using a general linear model for repeated measures (RMAOVA). We used data from all rats studied under protocol 1 and tested for an effect of the independent variable pentobarbital dose on the dependent variables phasic genioglossus activity and phasic diaphragmatic activity. Based on the data of Drummond *et al.*, who observed a decrease in genioglossus activity during transition from wakefulness to pentobarbital anesthesia,<sup>3</sup> we tested by RMAOVA the secondary hypothesis that pentobarbital decreases phasic genioglossus activity when compared with wakefulness. Finally, RMAOVA was used for comparing the effects on respiratory genioglossus activity of pentobarbital with those of normal REM and non-REM sleep. Scheffe's tests were used for *post hoc* testing throughout.

Calculation of the sample size for testing the primary criterion in the rat studies was based on the results of Younes *et al.*<sup>8</sup> who found a 20% increase in phasic genioglossus activation (SD 10%) and a 15% difference

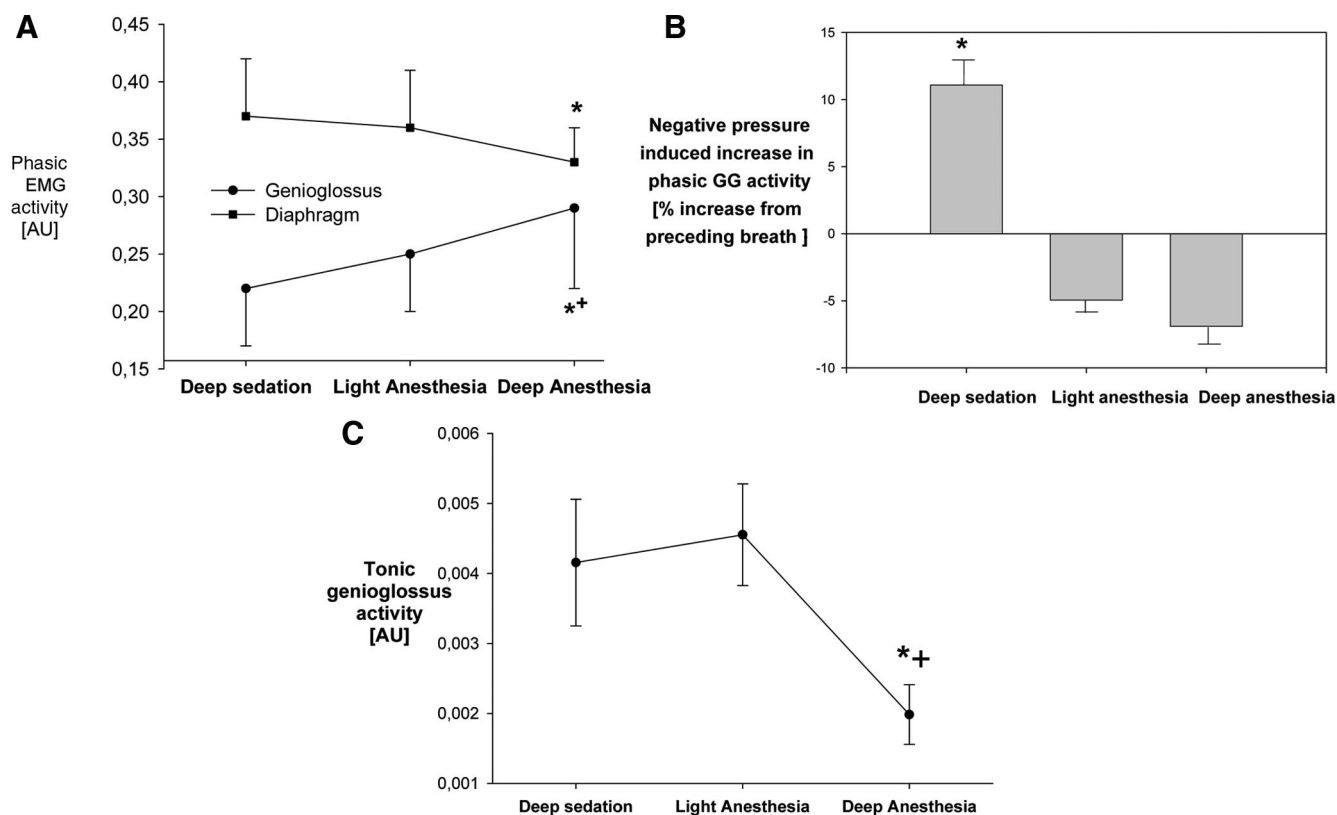

**Fig. 4.** Protocol 1: Effects of three different pentobarbital doses on respiratory muscle function (means  $\pm$  SEM). (A) Phasic activity of genioglossus (circles) and diaphragm (squares). \*  $P < 0.05$  versus deep sedation, same muscle. +  $P < 0.05$  versus diaphragm. (B) Negative pressure reflex. Increase in phasic genioglossus electromyogram in response to negative pharyngeal pressure application. \*  $P < 0.05$  versus preceding breath. (C) Tonic genioglossus activity. \*  $P < 0.05$  versus deep sedation, +  $P < 0.05$  versus light anesthesia. AU = arbitrary units; EMG = electromyogram; GG = genioglossus.

(SD 7%) in the magnitude of pentobarbital's effect at different muscles (genioglossus *vs.* diaphragm) ( $\alpha$ -error 0.01; power 99%). For testing the secondary hypothesis that pentobarbital decreases phasic genioglossus activity when compared with wakefulness, we expected a 10% difference (SD 5%;  $\alpha$ -error 0.01; power 99%).<sup>3</sup> Finally, for comparison of the effects of pentobarbital on respiratory genioglossus activity with normal REM and non-REM sleep, we expected a 10% difference (SD 5%) between pentobarbital and REM sleep ( $\alpha$ -error 0.01; power 99%), as well as a 10% difference (SD 5%) between pentobarbital and non-REM sleep. We calculated that a total sample size of 21 rats would provide a sufficient power to detect a significant difference in the primary, secondary, and exploratory hypotheses (power  $1 \times 2 \times 3 \times 4 \times 5 = 0.9$ ;  $\alpha < 0.05$ ). The results are expressed as the mean  $\pm$  SD unless indicated otherwise.

SPSS version 11.0 (SPSS Inc, Chicago, IL) as well as Sigma Stat version 3.0 (SPSS Inc) were used for statistical analyses.

## Results

### Protocol 1: Acute Experiments in Rats

The amplitude of the respiratory (phasic) genioglossus electromyogram increased significantly with pentobarbi-

tal dose, whereas the diaphragmatic electromyogram decreased (fig. 4A). During deep sedation, the negative pressure reflex was maintained (fig. 4B), but it was abolished during anesthesia. The amplitude of the tonic genioglossus electromyogram was unaffected at the two lower pentobarbital doses ( $P = 0.7$ ), but it was significantly lower during deep anesthesia (fig. 4C).

Pentobarbital induced significant dose-dependent decreases in respiratory rate, tidal volume, flow rate, and duty cycle. End-tidal carbon dioxide concentration increased as expected (fig. 5). Pentobarbital dose-dependently decreased heart rate:  $320 \pm 4$ ,  $307 \pm 4$ , and  $283 \pm 3$  beats/min during deep sedation, light anesthesia, and deep anesthesia, respectively. Mean arterial pressure also decreased with pentobarbital dose:  $92 \pm 8$  mmHg,  $80 \pm 7$ , and  $67 \pm 4$  mmHg, respectively.

Light and deep levels of anesthesia were achieved after administration of a total pentobarbital dose of  $68 \pm 3.5$  and  $84 \pm 3.7$  mg, respectively.

### Protocol 2: Chronically Instrumented Rats

Both of the pentobarbital doses produced anesthesia. Injection of 10 or 20 mg/kg intraperitoneally abolished the response to tail clamping after  $18.3 \pm 1.6$  min and  $6.2 \pm 0.6$  min, respectively. Compared to the awake state, both

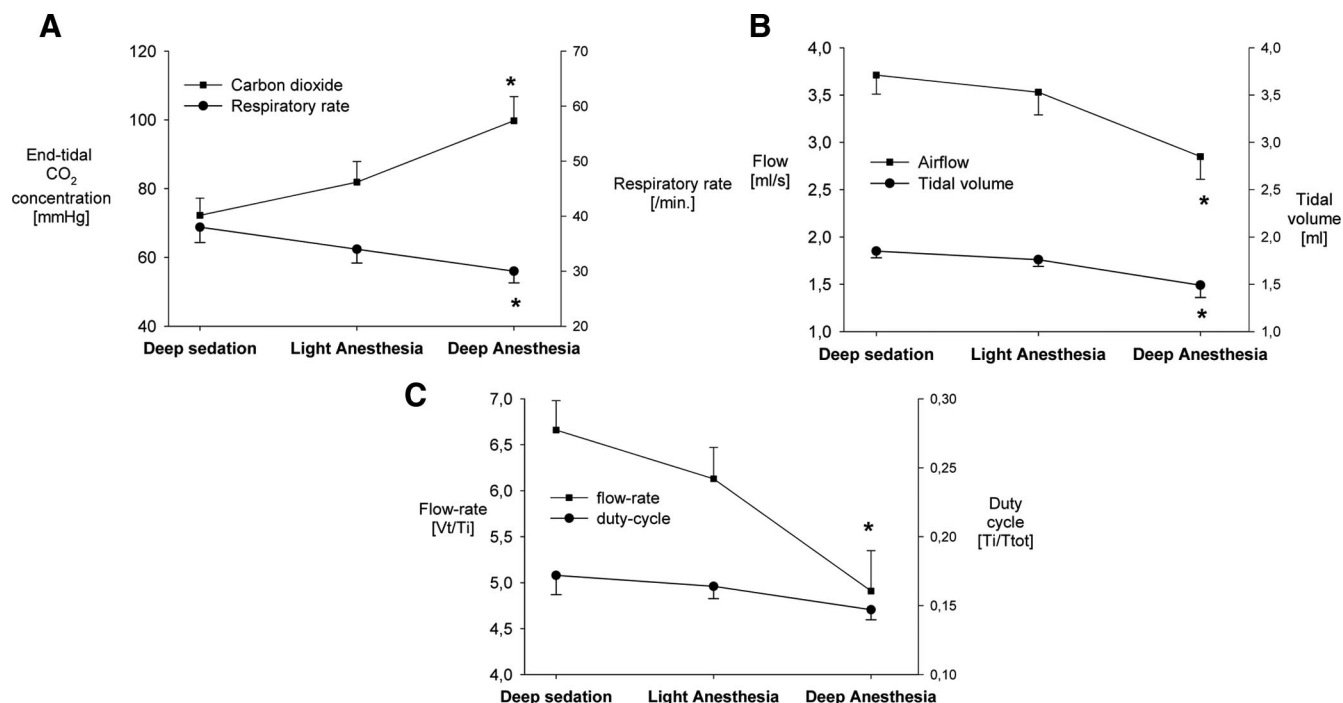

**Fig. 5. Protocol 1: Effects of three different pentobarbital doses on breathing (means  $\pm$  SEM). (A) End-tidal carbon dioxide concentration (*squares*) increased and respiratory rate (*circles*) decreased with increasing pentobarbital doses. \*  $P < 0.05$  versus deep sedation. (B) Air-flow (*squares*) and tidal-volume (*circles*) decreased with increasing pentobarbital doses. \*  $P < 0.05$  versus deep sedation. (C) Flow rate (Vt [tidal volume]/Ti [inspiration time]) decreased with increasing pentobarbital doses, whereas duty cycle (Ti [inspiratory time] and Ttot [total cycle-time]) did not significantly change. \*  $P < 0.05$  versus deep sedation. Vt = tidal volume, Ti = inspiration time, Ttot = total respiratory cycle duration.**

the phasic and tonic genioglossus electromyograms were significantly decreased, and the peak depression of muscle electromyograms did not differ when pentobarbital 10 versus 20 mg/kg were applied (fig. 6).

The genioglossus electromyogram was assessed during REM and non-REM sleep and after each dose of pentobarbital. Under each of these conditions, the tonic genioglossus electromyogram was depressed by approxi-

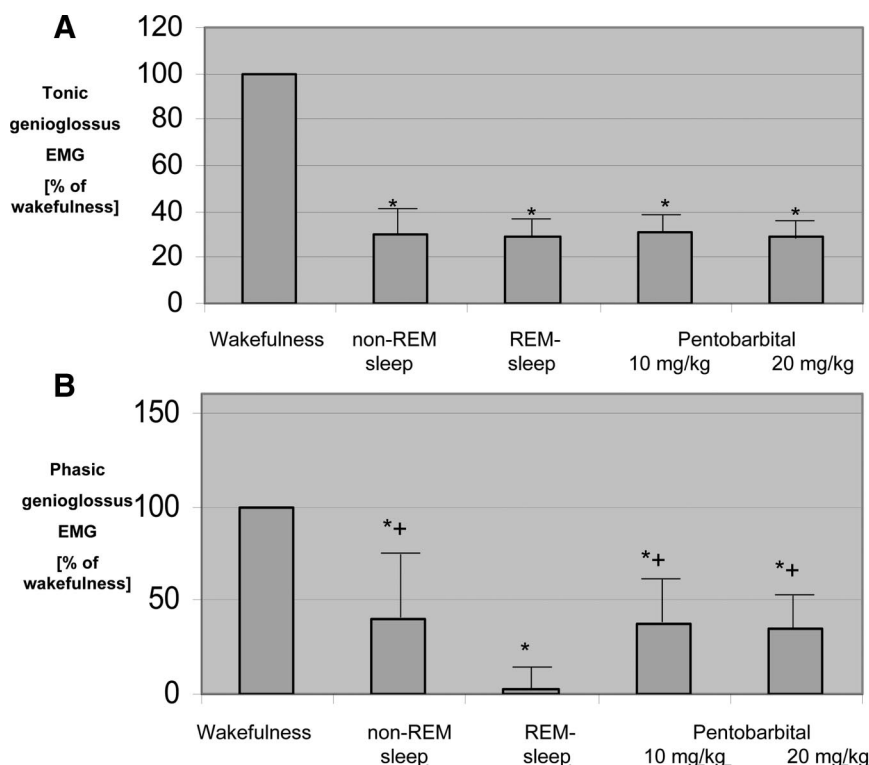

**Fig. 6. Comparison of the effects of pentobarbital and normal sleep on genioglossus muscle activity in chronically instrumented rats (means  $\pm$  SEM). (A) Nadir tonic (nonrespiratory) genioglossus muscle activity during wakefulness, sleep, and pentobarbital anesthesia. Compared to wakefulness activity, nadir genioglossus activity is significantly lower during sleep and pentobarbital anesthesia, but values observed during pentobarbital anesthesia did not differ from those observed during rapid eye movement (REM) and non-REM sleep. \*  $P < 0.05$  versus wakefulness. (B) Phasic (respiratory) genioglossus activity during wakefulness, sleep, and pentobarbital anesthesia. Compared to wakefulness activity, phasic genioglossus activity was significantly lower during sleep and pentobarbital anesthesia. Phasic (respiratory) genioglossus activity during REM sleep was significantly lower compared to non-REM sleep and pentobarbital anesthesia at a dose level of 10 mg/kg. EMG = electromyogram.**

mately the same amount compared to the awake state (fig. 6A). The phasic genioglossus electromyogram was also decreased during both normal sleep and anesthesia (fig. 6B), but the depression was most marked during REM sleep. The depression during REM was significantly greater than non-REM or after pentobarbital.

## Discussion

In this study, we found that anesthetic doses of pentobarbital impaired respiratory genioglossus activity compared to waking, but activity still exceeded that observed during natural REM sleep. During anesthesia, increasing doses of pentobarbital increased the phasic genioglossus electromyogram, despite a decreased phasic diaphragmatic electromyogram. As a technical note, this dose-dependency was observed under steady-state conditions in which pentobarbital was given as an infusion over half an hour. By contrast, we observed a ceiling effect of pentobarbital in the protocol when single bolus doses of pentobarbital were given to chronically instrumented rats. The difference in pentobarbital's effects on the genioglossus muscle between our two protocols might be explained by a time-dependent physiologic effect, such as different levels of hypercarbia being reached in the two protocols.

It is well known that a decrease in genioglossus tone occurs during the onset of normal sleep due to the loss of the wakefulness stimulus,<sup>14</sup> but this does not typically produce airway collapse unless there is an underlying anatomical abnormality. By contrast, anesthetics produce airway collapse. One possibility is that anesthetics produce more loss of upper airway muscle tone than what occurs during normal sleep. Orem *et al.* have studied the laryngeal abductors (the posterior cricoarytenoid muscles) during sleep, wakefulness, and barbiturate anesthesia in cats. The authors found that barbiturate anesthesia produced laryngeal abductor activity patterns characteristic of sleep.<sup>15</sup> In the current study, as expected, phasic genioglossus activity was abolished by REM sleep, whereas there was still some phasic genioglossus activity present with the anesthetic doses of pentobarbital applied to chronically instrumented rats. Moreover, our first protocol showed that pentobarbital increases phasic genioglossus activity when the effect due to sleep is eliminated. The explanation for this surprising finding is unclear.

One possibility is that there is a mismatch between measured electromyographic activity and muscle function. Depending on the load to the muscle, increased electromyogram activity may be associated with increased tension in the muscle or shortening of the fibers or both, such that no linear relation exists between genioglossus electromyogram and airway collapsibility. Nonetheless, the effects of sleep and anesthesia on ge-

nioglossus and diaphragm activity were measured with the same technique; therefore, we feel these comparisons are valid. Phasic genioglossus activation increases the size of the airway and decreases collapsibility, and it may be particularly important under conditions when protective reflexes (*e.g.*, the negative pressure reflex) are impaired. However, future studies will be required to show whether or not the activating effects of pentobarbital on the genioglossus electromyogram translate to a more stable upper airway, particularly because this may not offset the abolition of genioglossus responses to negative pharyngeal pressure during pentobarbital anesthesia. Blockade of this important reflex may be the key mechanism responsible for anesthetics airway-collapsing effects.

Probably the most interesting finding of this study relates to the dissociation of pentobarbital's respiratory effects on the genioglossus (activation) and breathing (inhibition of diaphragmatic activity and consequent hypercarbia), which we observed in our acute experiments in the absence of airflow. This is in contrast to isoflurane's increasing effects on genioglossal activity, which are positively correlated with improved flow rate and tidal volume (and also diaphragmatic activity; unpublished data, M. Eikermann, M.D., Ph.D. and N.L. Chamberlain, Ph.D., Boston, MA). Thus, the effects of isoflurane and pentobarbital on respiratory muscle function must be partly mediated by different mechanisms. The effects of isoflurane could be explained by a simple increase in inspiratory drive; however, this is not the case with pentobarbital.

We speculate that the most likely explanation is that pentobarbital has differential effects on hypoglossal and phrenic premotoneurons and that the effect is *via* disinhibition. Barbiturates are well-known to potentiate  $\gamma$ -aminobutyric-acid (GABA)-ergic inhibition by increasing chloride influx through GABA<sub>A</sub> channels. Therefore, direct effects of barbiturates on motoneurons would be expected to be inhibitory. Indeed, Park *et al.* have shown that administration of several common hypnotic GABA<sub>A</sub>ergic agents into the hypoglossal motor nucleus decreased genioglossus activity. By contrast, systemic administration of the same drugs increases genioglossus but not diaphragmatic activity.<sup>16</sup> Thus, the activating effects of GABA<sub>A</sub>ergic drugs on respiratory genioglossus activity cannot be explained by direct effects on hypoglossal motoneurons. Rather, both pentobarbital's increasing effects on phasic genioglossus activity and its decreasing effects on the genioglossus negative pressure reflex could be mediated by inhibition of inhibitory neurons located in the periobex that relay negative pressure-related stimuli to hypoglossal motoneurons from the nucleus of the solitary tract.<sup>17</sup> In fact, pentobarbital's effects resemble those observed after microinjection of the GABA<sub>A</sub> agonist muscimol into the periobex,<sup>17</sup> an effect we suspect is the result of disinhibition of hypo-



glossal motoneurons. The findings of Park *et al.* suggest<sup>16</sup> that the effects of pentobarbital on genioglossus muscle activation are not specific to this agent but rather represent a GABA<sub>A</sub> receptor agonist class effect. It will be interesting to study the effects of short-acting barbiturates on genioglossus muscle control.

Although we suspect that the major effect of pentobarbital on genioglossus activity is mediated by disinhibition, it is also possible that hypercapnia plays a role. Pentobarbital inhibits ventilatory responses to carbon dioxide, resulting in hypercapnia. The genioglossus is more sensitive than the pump muscles to several conditions, including hypercapnia, behavioral state, and vagotomy.<sup>18,19</sup> To the extent that chemoreflex activation of the genioglossus muscle may occur independently of ventilatory drive, it is possible that elevated carbon dioxide may partially account for the divergence between the genioglossus and diaphragm activities under pentobarbital anesthesia.<sup>18</sup>

Differential effects of pentobarbital on respiratory pump *versus* airway muscles have been reported before.<sup>20,8</sup> Warner *et al.* showed in pentobarbital-anesthetized dogs that phasic electrical activity increased over time in the triangularis sterni, transversus abdominis, and external oblique muscles (expiratory muscles), whereas electrical activity of the costal diaphragm, crural diaphragm, and parasternal intercostal muscles (inspiratory muscles) was unchanged.<sup>20</sup> Younes *et al.* found in rats a trend towards lower minute diaphragmatic activity and a higher genioglossus activity at the time of carbon dioxide-induced arousal when pentobarbital was given.<sup>8</sup> Our study confirms and extends these data by showing dose-dependency in an isolated upper airway in the absence of air flow. We also show this effect is selective for phasic respiratory activity as tonic and negative pressure reflex activities were inhibited.

Our results are at odds with those of Hwang *et al.*, who reported that pentobarbital depresses hypoglossal output more than phrenic. These results may result from the fact that they used animals that were decerebrated and vagotomized.<sup>1</sup> In fact, the vagus nerve is important for mediating the interplay between lung volume and upper airway muscle activity, and lung inflation decreases genioglossus muscle activity, an effect that is mediated by the vagus nerve as the afferent pathway.<sup>21</sup> The effects of anesthetics on respiratory muscles differ between species,<sup>22</sup> and it is unclear whether our findings translate to humans. Comparative studies in humans of the differential effects of various anesthetics on pharyngeal mechanics are clearly needed. In summary, pentobarbital in rats impairs respiratory genioglossus activity compared to

the awake state, but the decrease is no greater than seen during natural sleep. During anesthesia, phasic genioglossus activity is increased in a dose-dependent fashion.

The authors thank Quan Ha, Research Assistant, Department of Neurology, Beth Israel Deaconess Medical Center, Boston, MA, for excellent technical support.

## References

- Hwang JC, St John WM, Bartlett D Jr: Respiratory-related hypoglossal nerve activity: Influence of anesthetics. *J Appl Physiol* 1983; 55:785-92
- Ochiai R, Guthrie RD, Motoyama EK: Differential sensitivity to halothane anesthesia of the genioglossus, intercostals, and diaphragm in kittens. *Anesth Analg* 1992; 74:338-44
- Drummond GB: Influence of thiopentone on upper airway muscles. *Br J Anaesth* 1989; 63:12-21
- Eastwood PR, Platt PR, Shepherd K, Maddison K, Hillman DR: Collapsibility of the upper airway at different concentrations of propofol anesthesia. *ANESTHESIOLOGY* 2005; 103:470-7
- Eastwood PR, Szollosi I, Platt PR, Hillman DR: Collapsibility of the upper airway during anesthesia with isoflurane. *ANESTHESIOLOGY* 2002; 97:786-93
- Norton JR, Ward DS, Karan S, Voter WA, Palmer L, Varlese A, Rackovsky O, Bailey P: Differences between midazolam and propofol sedation on upper airway collapsibility using dynamic negative airway pressure. *ANESTHESIOLOGY* 2006; 104:1155-64
- Roda F, Pio J, Bianchi AL, Gestreau C: Effects of anesthetics on hypoglossal nerve discharge and c-Fos expression in brainstem hypoglossal premotor neurons. *J Comp Neurol* 2004; 468:571-86
- Younes M, Park E, Horner RL: Pentobarbital sedation increases genioglossus respiratory activity in sleeping rats. *Sleep* 2007; 30:478-88
- Eikermann M, Fassbender P, Malhotra A, Jordan AS, Zaremba S, Gautam S, White DP, Chamberlin NL: Differential effects of isoflurane and propofol on genioglossus muscle function and breathing. *ANESTHESIOLOGY* 2008; 108:897-906
- Orth M, Barter L, Dominguez C, Atherley R, Carstens E, Antognini JF: Halothane and propofol differentially affect electroencephalographic responses to noxious stimulation. *Br J Anaesth* 2005; 95:477-84
- Kissin I, Stanski DR, Brown PT, Bradley EL Jr: Pentobarbital-morphine anesthetic interactions in terms of intensity of noxious stimulation required for arousal. *ANESTHESIOLOGY* 1993; 78: 744-9
- Lu J, Sherman D, Devor M, Saper CB: A putative flip-flop switch for control of REM sleep. *Nature* 2006; 441:589-94
- Eikermann M, Fassbender P, Malhotra A, Takahashi M, Kubo S, Jordan AS, Gautam S, White DP, Chamberlin NL: Unwarranted administration of acetylcholinesterase inhibitors can impair genioglossus and diaphragm muscle function. *ANESTHESIOLOGY* 2007; 107:621-9
- Lo YL, Jordan AS, Malhotra A, Wellman A, Heinzer RA, Eikermann M, Schory K, Dover L, White DP: Influence of wakefulness on pharyngeal airway muscle activity. *Thorax* 2007; 62:799-805
- Orem J, Lydic R: Upper airway function during sleep and wakefulness: Experimental studies on normal and anesthetized cats. *Sleep* 1978; 1:49-68
- Park E, Younes M, Liu H, Liu X, Horner RL: Systemic *versus* central administration of common hypnotics reveals opposing effects on genioglossus muscle activity in rats. *Sleep* 2008; 31:355-65
- Chamberlin NL, Eikermann M, Fassbender P, White DP, Malhotra A: Genioglossus premotoneurons and the negative pressure reflex in rats. *J Physiol* 2007; 579:515-26
- Horner RL, Liu X, Gill H, Nolan P, Liu H, Sood S: Effects of sleep-wake state on the genioglossus *versus* diaphragm muscle response to CO(2) in rats. *J Appl Physiol* 2002; 92:878-87
- Bailey EF, Jones CL, Reeder JC, Fuller DD, Fregosi RF: Effect of pulmonary stretch receptor feedback and CO(2) on upper airway and respiratory pump muscle activity in the rat. *J Physiol* 2001; 532:525-34
- Warner DO, Joyner MJ, Rehder K: Electrical activation of expiratory muscles increases with time in pentobarbital-anesthetized dogs. *J Appl Physiol* 1992; 72:2285-91
- van Lunteren E, Strohl KP, Parker DM, Bruce EN, Van de Graaff WB, Cherniack NS: Phasic volume-related feedback on upper airway muscle activity. *J Appl Physiol* 1984; 56:730-6
- Warner DO, Joyner MJ, Ritman EL: Anesthesia and chest wall function in dogs. *J Appl Physiol* 1994; 76:2802-13
